# Supplementary material
Source: MDPI journal article supplement (https://www.mdpi.com/2073-8994/15/12/2147)
Supplement: s1 [file s1]

# DETAILS ON RESULTS – ADDITIONAL TABLES

**Table S1.** Results of the First Linear Mixed-Effects Model for Asymmetry, Stage, and Lesson Parameters.

| <i>Predictors</i>                                                   | <b>total</b>     |              |          |
|---------------------------------------------------------------------|------------------|--------------|----------|
|                                                                     | <i>Estimates</i> | <i>CI</i>    | <i>p</i> |
| (Intercept)                                                         | 0.90             | 0.74 – 1.07  | <0.001   |
| Asmin [right]                                                       | -0.07            | -0.26 – 0.11 | 0.435    |
| Asmax [right]                                                       | -0.06            | -0.25 – 0.12 | 0.488    |
| Asrash [right]                                                      | -0.12            | -0.31 – 0.06 | 0.194    |
| stage [2(after)]                                                    | -0.13            | -0.36 – 0.10 | 0.258    |
| lesson [2]                                                          | 0.04             | -0.19 – 0.27 | 0.721    |
| Asmin [right] × Asmax [right]                                       | 0.12             | -0.09 – 0.34 | 0.257    |
| Asmin [right] × Asrash [right]                                      | 0.04             | -0.19 – 0.27 | 0.732    |
| Asmax [right] × Asrash [right]                                      | 0.15             | -0.09 – 0.38 | 0.213    |
| Asmin [right] × stage [2(after)]                                    | 0.15             | -0.10 – 0.41 | 0.238    |
| Asmax [right] × stage [2(after)]                                    | 0.03             | -0.24 – 0.31 | 0.813    |
| Asrash [right] × stage [2(after)]                                   | 0.26             | -0.01 – 0.52 | 0.061    |
| Asmin [right] × lesson [2]                                          | -0.06            | -0.32 – 0.19 | 0.617    |
| Asmax [right] × lesson [2]                                          | -0.09            | -0.35 – 0.17 | 0.480    |
| Asrash [right] × lesson [2]                                         | 0.13             | -0.14 – 0.39 | 0.351    |
| stage [2(after)] × lesson [2]                                       | 0.09             | -0.22 – 0.39 | 0.567    |
| (Asmin [right] × Asmax [right]) × Asrash [right]                    | -0.06            | -0.35 – 0.22 | 0.655    |
| (Asmin [right] × Asmax [right]) × stage [2(after)]                  | -0.09            | -0.40 – 0.22 | 0.568    |
| (Asmin [right] × Asrash [right]) × stage [2(after)]                 | -0.21            | -0.52 – 0.10 | 0.189    |
| (Asmax [right] × Asrash [right]) × stage [2(after)]                 | -0.14            | -0.48 – 0.20 | 0.425    |
| (Asmin [right] × Asmax [right]) × lesson [2]                        | 0.08             | -0.22 – 0.38 | 0.609    |
| (Asmin [right] × Asrash [right]) × lesson [2]                       | -0.04            | -0.35 – 0.27 | 0.801    |
| (Asmax [right] × Asrash [right]) × lesson [2]                       | -0.07            | -0.41 – 0.26 | 0.653    |
| (Asmin [right] × stage [2(after)]) × lesson [2]                     | -0.12            | -0.50 – 0.25 | 0.521    |
| (Asmax [right] × stage [2(after)]) × lesson [2]                     | 0.17             | -0.22 – 0.55 | 0.390    |
| (Asrash [right] × stage [2(after)]) × lesson [2]                    | -0.26            | -0.62 – 0.10 | 0.157    |
| (Asmin [right] × Asmax [right] × Asrash [right]) × stage [2(after)] | 0.06             | -0.36 – 0.48 | 0.768    |
| (Asmin [right] × Asmax [right] × Asrash [right]) × lesson [2]       | 0.02             | -0.39 – 0.43 | 0.928    |

|                                                                                  |       |              |       |
|----------------------------------------------------------------------------------|-------|--------------|-------|
| (Asmin [right] × Asmax [right] × stage [2(after)]) × lesson [2]                  | -0.11 | -0.56 – 0.35 | 0.648 |
| (Asmin [right] × Asrash [right] × stage [2(after)]) × lesson [2]                 | 0.12  | -0.35 – 0.59 | 0.598 |
| (Asmax [right] × Asrash [right] × stage [2(after)]) × lesson [2]                 | -0.10 | -0.56 – 0.36 | 0.670 |
| (Asmin [right] × Asmax [right] × Asrash [right] × stage [2(after)]) × lesson [2] | 0.23  | -0.37 – 0.83 | 0.446 |

#### Random Effects

|                                                      |               |
|------------------------------------------------------|---------------|
| $\sigma^2$                                           | 0.01          |
| $\tau_{00}$ subject                                  | 0.00          |
| ICC                                                  | 0.41          |
| N <sub>subject</sub>                                 | 27            |
| Observations                                         | 108           |
| Marginal R <sup>2</sup> / Conditional R <sup>2</sup> | 0.235 / 0.550 |

**Table S2.** Results of the Final Linear Mixed-Effects Model for Asymmetry, Stage, and Lesson Parameters.

| <i>Predictors</i>                                | <b>total</b>     |               |                  |
|--------------------------------------------------|------------------|---------------|------------------|
|                                                  | <i>Estimates</i> | <i>CI</i>     | <i>p</i>         |
| (Intercept)                                      | 0.88             | 0.81 – 0.95   | <b>&lt;0.001</b> |
| Asmin [right]                                    | -0.06            | -0.12 – 0.01  | 0.097            |
| Asmax [right]                                    | -0.05            | -0.11 – 0.00  | 0.050            |
| Asrash [right]                                   | -0.04            | -0.10 – 0.03  | 0.268            |
| stage [2(after)]                                 | -0.04            | -0.10 – 0.02  | 0.229            |
| lesson [2]                                       | 0.02             | -0.05 – 0.10  | 0.540            |
| Asmin [right] × Asmax [right]                    | 0.13             | 0.05 – 0.20   | <b>0.001</b>     |
| Asrash [right] × stage [2(after)]                | 0.08             | -0.01 – 0.18  | 0.082            |
| Asmin [right] × lesson [2]                       | -0.07            | -0.14 – -0.00 | <b>0.041</b>     |
| Asrash [right] × lesson [2]                      | 0.07             | -0.02 – 0.15  | 0.148            |
| stage [2(after)] × lesson [2]                    | 0.04             | -0.05 – 0.14  | 0.380            |
| (Asrash [right] × stage [2(after)]) × lesson [2] | -0.13            | -0.27 – 0.00  | 0.057            |

#### Random Effects

|                                                      |               |
|------------------------------------------------------|---------------|
| $\sigma^2$                                           | 0.01          |
| $\tau_{00}$ subject                                  | 0.00          |
| ICC                                                  | 0.44          |
| N <sub>subject</sub>                                 | 27            |
| Observations                                         | 108           |
| Marginal R <sup>2</sup> / Conditional R <sup>2</sup> | 0.136 / 0.519 |
